# Supplementary material for: Improving the Stability of Halide Perovskite Solar Cells Using Nanoparticles of Tungsten Disulfide
Source: MDPI journal article supplement (doi:10.3390/nano12244454), 2022-12-15
Supplement: s1 [file s1]

## Supporting Information

# Improving the Stability of Halide Perovskite Solar Cells Using Nanoparticles of Tungsten Disulfide

Philip Nathaniel Immanuel <sup>1,2,†</sup>, Song-Jeng Huang <sup>1,†</sup>, Viktor Danchuk <sup>2</sup>, Anastasiya Sedova <sup>2</sup>, Johnathan Prilusky <sup>2</sup>, Achiad Goldreich <sup>2</sup>, Hila Shalom <sup>2</sup>, Albina Musin <sup>3</sup> and Lena Yadgarov <sup>2,\*</sup>

<sup>1</sup> Department of Mechanical Engineering, National Taiwan University of Science and Technology, Taipei 106, Taiwan; [nathaniel.philip@gmail.com](mailto:nathaniel.philip@gmail.com) (P.N.I.); [sgjghuang@mail.ntust.edu.tw](mailto:sgjghuang@mail.ntust.edu.tw) (S.-J.H.)

<sup>2</sup> Department of Chemical Engineering, Faculty of Engineering, Ariel University, Ariel 4076414, Israel; [viktorde@ariel.ac.il](mailto:viktorde@ariel.ac.il) (V.D.); [nastiona212@gmail.com](mailto:nastiona212@gmail.com) (A.S.); [jonathanprilusky@gmail.com](mailto:jonathanprilusky@gmail.com) (J.P.); [achiad132@gmail.com](mailto:achiad132@gmail.com) (A.G.); [hila.shalom1@msmail.ariel.ac.il](mailto:hila.shalom1@msmail.ariel.ac.il) (H.S.)

<sup>3</sup> Physics Department, Faculty of Natural Sciences, Ariel University, Ariel 4076414, Israel; [albinam@ariel.ac.il](mailto:albinam@ariel.ac.il)

\* Correspondence: [lenay@ariel.ac.il](mailto:lenay@ariel.ac.il)

† These authors contributed equally to this work.

## Abbreviations

MAPbI<sub>3</sub> - methylammonium lead iodide

WS<sub>2</sub> NPs- Tungsten disulfide Nano particles

C1 – 1 wt% concentration of WS<sub>2</sub> NPs,

C2 – 2 wt% concentration of WS<sub>2</sub> NPs,

C3 – 3 wt% concentration of WS<sub>2</sub> NPs.

SEM – Scanning Electron Microscope

XRD- X-ray Diffraction

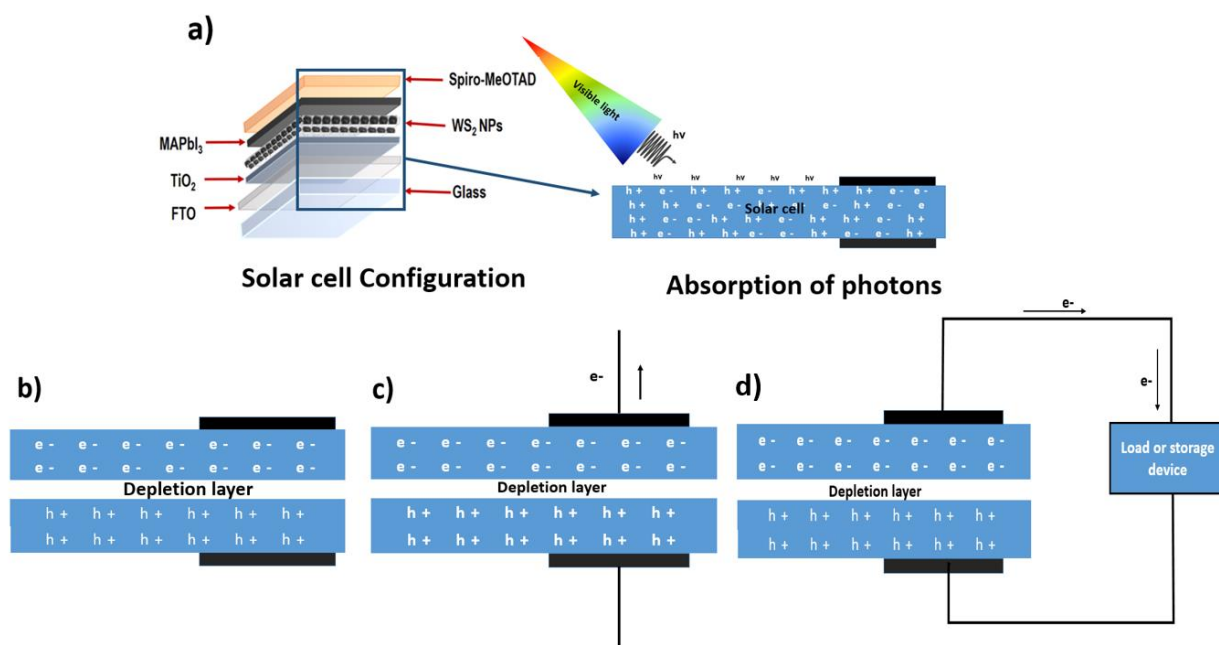

**Scheme S1.** a) absorption of photons with WS<sub>2</sub> NPs/MAPbI<sub>3</sub>, b) creation of free charge carriers: separation of electron-hole pair by internal field, c) collection and d) transportation of photo-generated charge carriers through an electrical circuit.

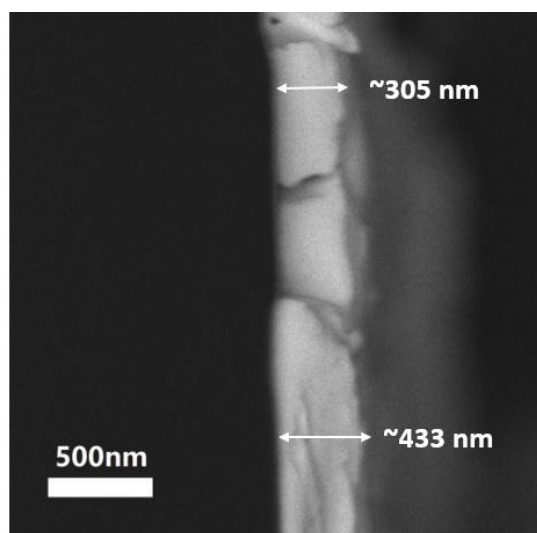

**Figure S1.** Cross section SEM images of MAPbI<sub>3</sub> layer.

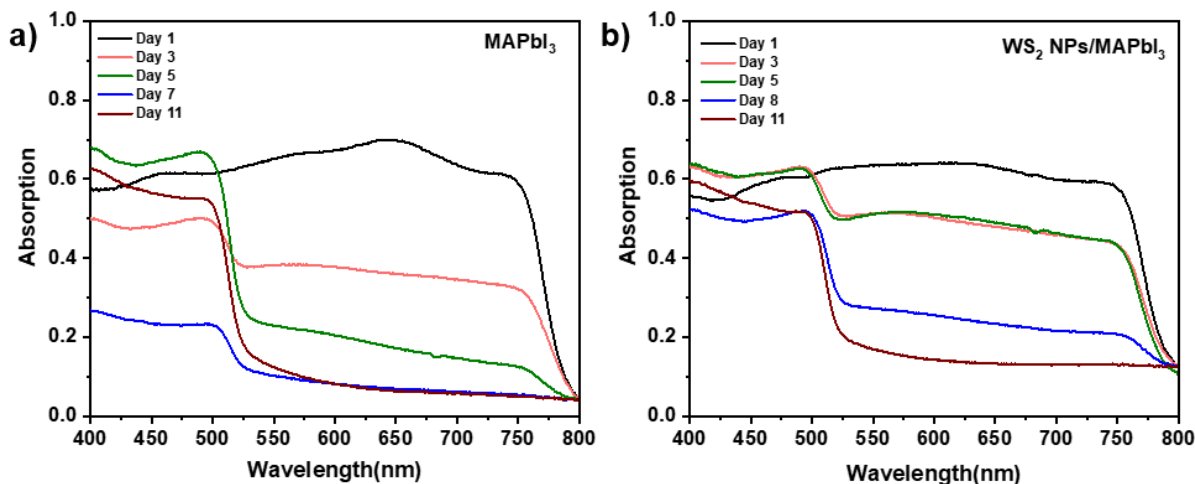

**Figure S2.** Stability measurement of a) MAPbI<sub>3</sub> and b) WS<sub>2</sub> NPs/MAPbI<sub>3</sub> films in petri dish.

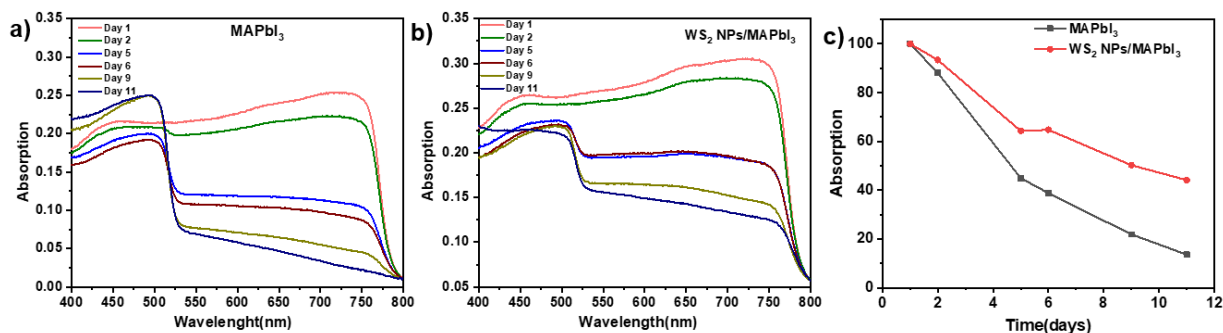

**Figure S3.** Stability measurement of a) MAPbI<sub>3</sub>, b) WS<sub>2</sub> NPs/MAPbI<sub>3</sub> films on vacuum sealed bags, c) absorption percentage of the hybrid WS<sub>2</sub> NPs/MAPbI<sub>3</sub> (red line) and the pristine MAPbI<sub>3</sub> (black line).

In addition to the stability test described in the main test, we examined the stability of the MAPbI<sub>3</sub> and WS<sub>2</sub> NPs/MAPbI<sub>3</sub> film in vacuum sealed bag under sunlight (**Figure S4**). Compared with the previous results (**Figure 4c, main text**), the WS<sub>2</sub> NPs/MAPbI<sub>3</sub> absorption dropped faster. One of the possible reasons for this inconsistency is the amount of the absorbed light (radiation) and heat. Namely, when the samples were placed in a petri dish, the light was absorbed not only by the examined films and the covering bag, but also by the petri dish. Thus, the WS<sub>2</sub> NPs/MAPbI<sub>3</sub> and MAPbI<sub>3</sub> were exposed to sunlight less than the films examined on the vacuum-sealed bags. Nevertheless, at eleventh days, the absorption rate of the hybrid was ~45% whereas the absorption of MAPbI<sub>3</sub> film was only 10%.

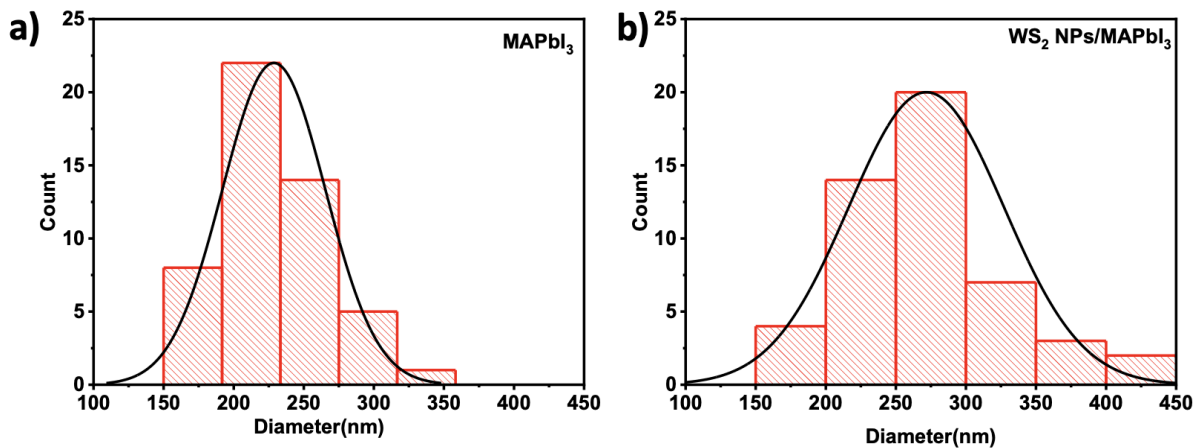

**Figure S4.** Grain size distribution of a) MAPbI<sub>3</sub> and b) WS<sub>2</sub> NPs/MAPbI<sub>3</sub> with 1 wt%.

(The analysis is done on SEM micrographs of **Figure 2a and b** in the main text)

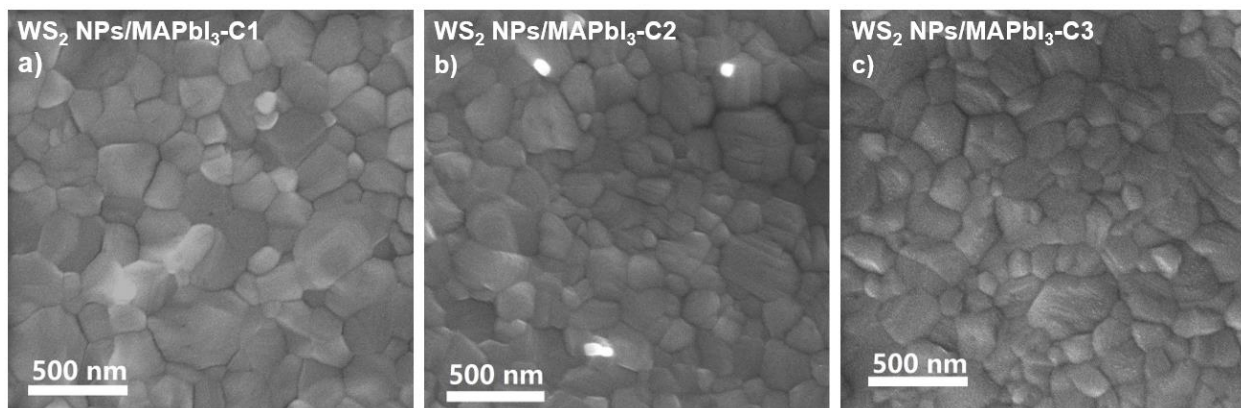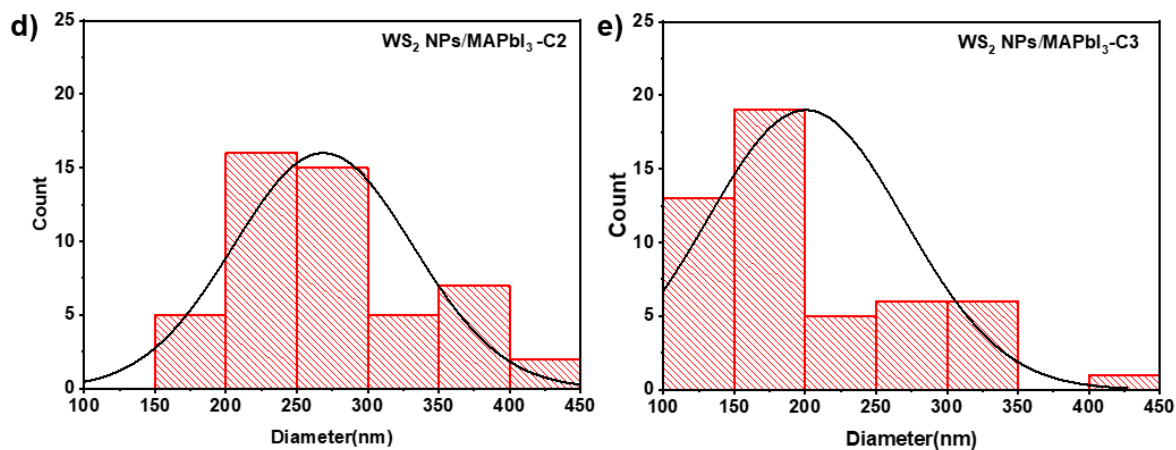

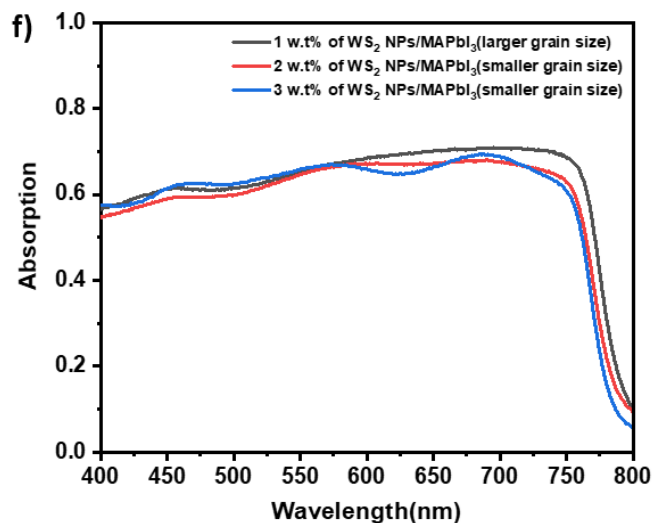

**Figure S5.** (a-c) SEM images of the WS<sub>2</sub> NPs/MAPbI<sub>3</sub> layers with increased concentration of WS<sub>2</sub> NPs. Here C1 – 1 wt% concentration of WS<sub>2</sub> NPs, C2 – 2 wt% concentration of WS<sub>2</sub> NPs, C3 – 3 wt% concentration of WS<sub>2</sub> NPs. d) Grain size distribution of a) WS<sub>2</sub> NPs/MAPbI<sub>3</sub> for C2 concentration of NPs and e) WS<sub>2</sub> NPs/MAPbI<sub>3</sub> for C3 concentration of NPs. f) Absorbance spectrum of MAPbI<sub>3</sub> with three grain size.

The enhancement in the absorption of MAPbI<sub>3</sub> film due to the high absorption coefficient of WS<sub>2</sub> NPs. On the other hand, the larger grain size of MAPbI<sub>3</sub> is due to the distribution of WS<sub>2</sub> NPs on the substrate. When the concentration of the WS<sub>2</sub> NPs is higher (2 w.t% or 3 w.t%), more aggregation occurs, which leads to uneven size distribution in grains. Although the absorption enhanced, this is not due to the grain size. The absorbance spectrum of MAPbI<sub>3</sub> for three-grain size was shown in **Figure S5 (f)**.

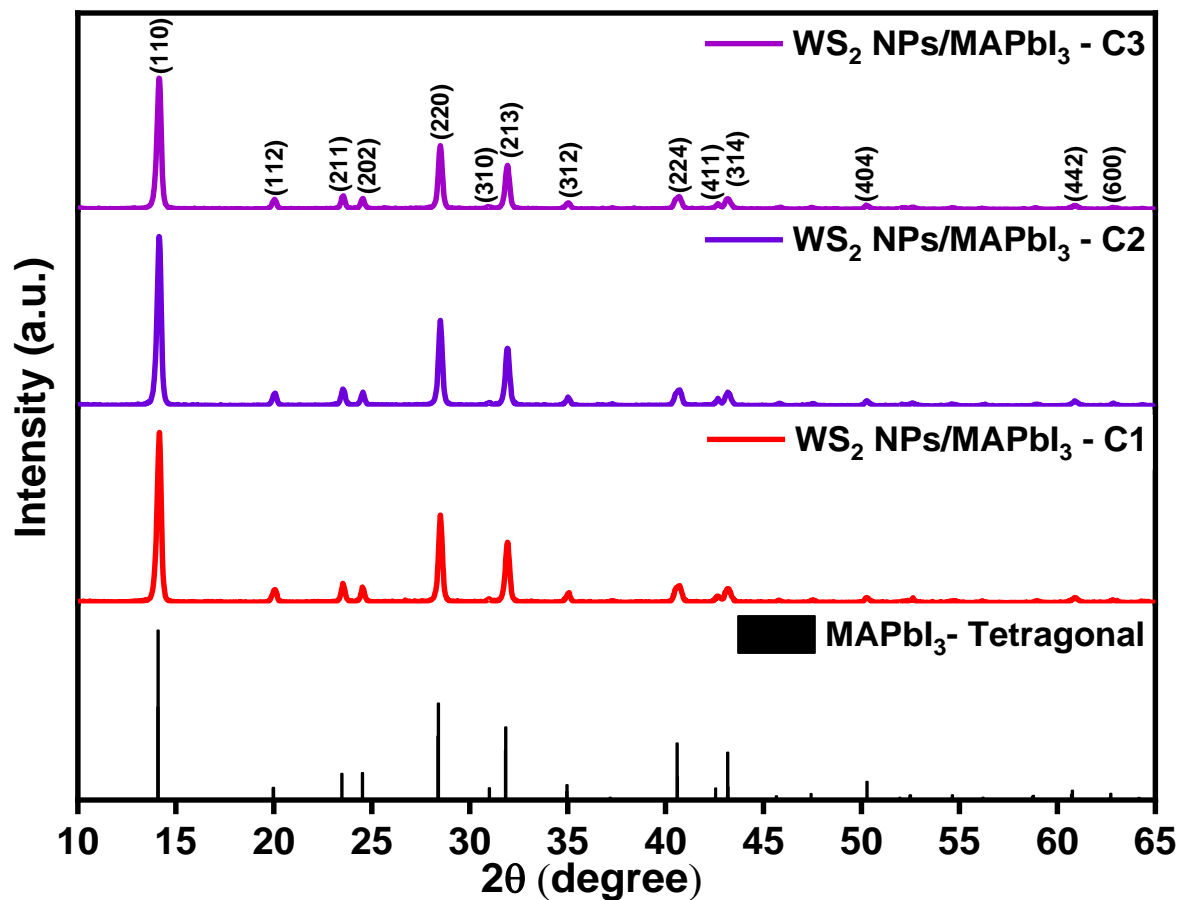

**Figure S6.** XRD patterns of the WS<sub>2</sub> NPs/MAPbI<sub>3</sub> layers with increased concentration of WS<sub>2</sub> NPs. Here C1 - 1 wt% concentration of WS<sub>2</sub> NPs, C2 - 2 wt% concentration of WS<sub>2</sub> NPs, C3 - 3 wt% concentration of WS<sub>2</sub>

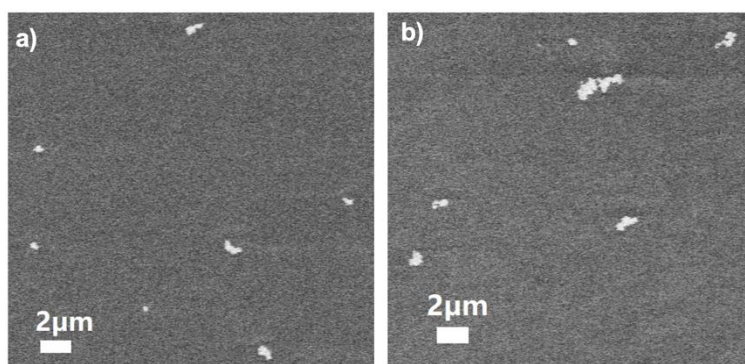

**Figure S7.** a) SEM images of WS<sub>2</sub> NPs on glasses with C1 concentration and b) SEM images of WS<sub>2</sub> NPs on glasses with C3 concentration.



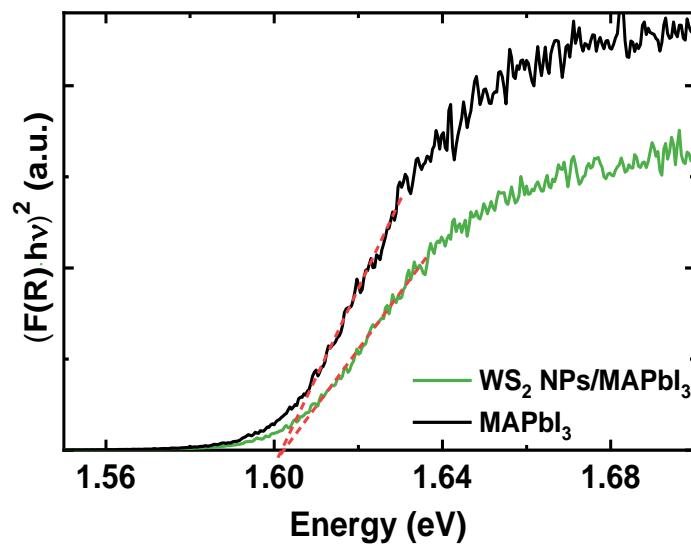

**Figure S8.** Calculated band gap of MAPbI<sub>3</sub> and WS<sub>2</sub> NPs/MAPbI<sub>3</sub>

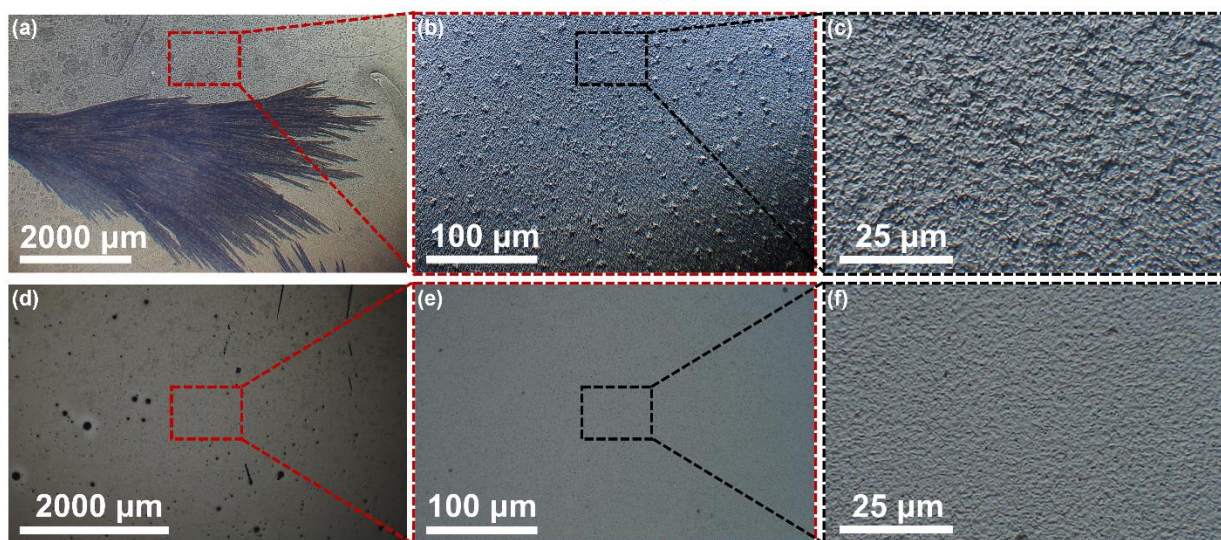

**Figure S9.** Light microscope images of three different magnifications of the (a-c) MAPbI<sub>3</sub> and (d-f) WS<sub>2</sub> NPs/MAPbI<sub>3</sub> layers on the FTO glass after exposure to air.

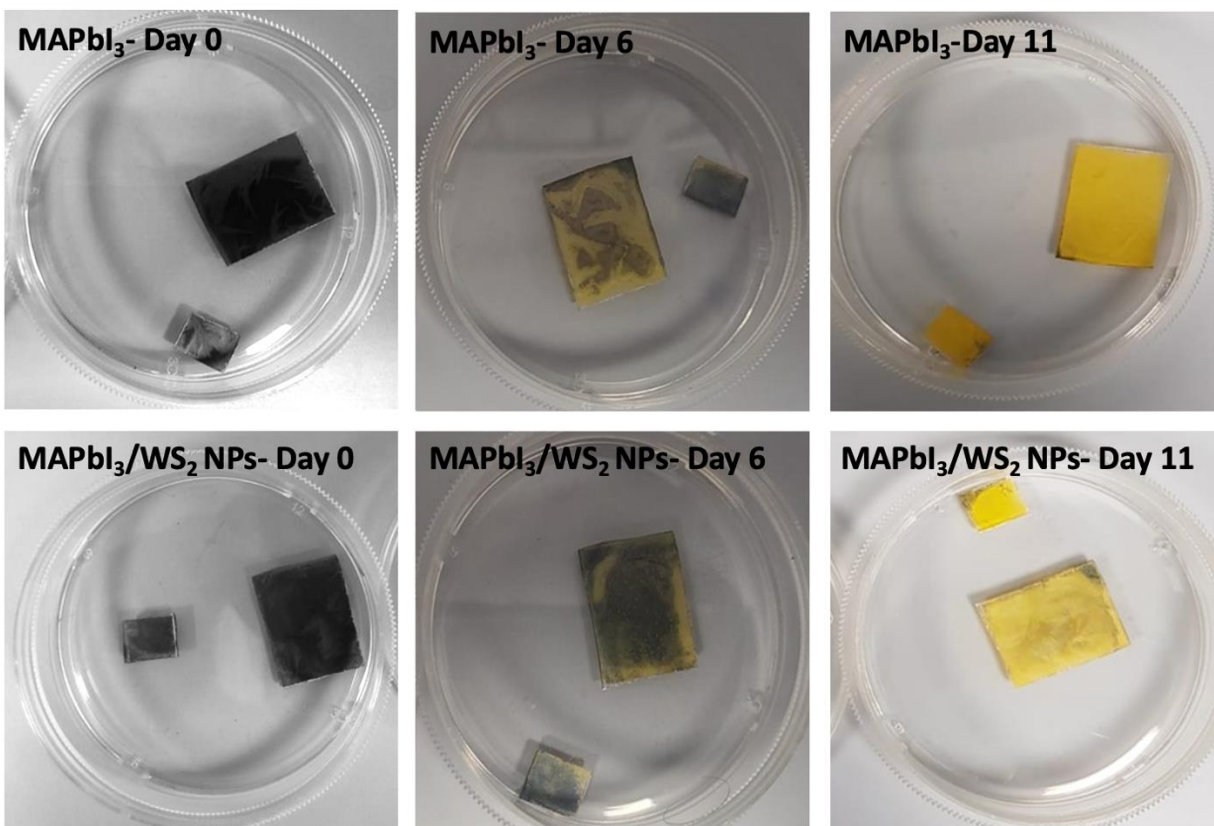

**Figure S10.** Picture of MAPbI<sub>3</sub> films and WS<sub>2</sub> NPs/MAPbI<sub>3</sub> films after stability test under sun light.
